CORRECTION

# Correction: Antiarrhythmic Agents and the Risk of Malignant Neoplasm of Liver and Intrahepatic Bile Ducts

The *PLOS ONE* Staff

The following information is missing from the Funding section.

This study was supported by grants from the National Science Council, Executive Yuan, Taiwan, ROC (NSC-101-2320-B-039-007-MY3), China Medical University Hospital, Taichung, Taiwan (DMR-103-049), partially supported by the Taiwan Ministry of Health and Welfare Clinical Trial and Research Center of Excellence (MOHW103-TDU-B-212-113002), Health and welfare surcharge of tobacco products, China Medical University Hospital Cancer Research Center of Excellence (MOHW104-TD-B-111-03, Taiwan), and by China Medical University under the Aim for the Top University Plan of the Ministry of Education, Taiwan.

## Reference

1. Lim Y-P, Lin C-L, Lin Y-N, Ma W-C, Chen W-C, Hung D, et al. (2015) Antiarrhythmic Agents and the Risk of Malignant Neoplasm of Liver and Intrahepatic Bile Ducts. *PLoS ONE* 10(1): e0116960. doi: [10.1371/journal.pone.0116960](https://doi.org/10.1371/journal.pone.0116960) PMID: [25590332](https://pubmed.ncbi.nlm.nih.gov/25590332/)

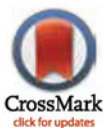

## OPEN ACCESS

**Citation:** The *PLOS ONE* Staff (2015) Correction: Antiarrhythmic Agents and the Risk of Malignant Neoplasm of Liver and Intrahepatic Bile Ducts. *PLoS ONE* 10(3): e0121942. doi:10.1371/journal.pone.0121942

**Published:** March 27, 2015

**Copyright:** © 2015 The PLOS ONE Staff. This is an open access article distributed under the terms of the [Creative Commons Attribution License](https://creativecommons.org/licenses/by/4.0/), which permits unrestricted use, distribution, and reproduction in any medium, provided the original author and source are credited.
